# Supplementary material for: Effects of polyacrylic acid molecular weights on V2C-MXene nanocoatings for obtaining ultralow friction and ultralow wear in an ambient working environment
Source: Royal Society of Chemistry journal article supplement (doi:10.1039/d2cp03639h), 2022-01-01
Supplement: d2cp03639h1.pdf [file d2cp03639h1.pdf]

## Supporting Information

### **Effects of polyacrylic acid molecular weight on V<sub>2</sub>C-MXene nanocoating for obtaining ultralow friction and ultralow wear under ambient working environment**

Xuan Yin,<sup>\*a</sup> Haohao Chen,<sup>a</sup> Lai Jiang,<sup>b</sup> Chang Liang,<sup>a</sup> Haosheng Pang,<sup>\*c</sup> Dameng Liu<sup>\*c</sup>  
and Bing Zhang<sup>a</sup>

<sup>a</sup> *College of Mechanical and Electrical Engineering, Beijing University of Chemical Technology, Beijing 100029, China*

<sup>b</sup> *College of Materials Science and Engineering, Beijing University of Chemical Technology, Beijing 100029, China*

<sup>c</sup> *State Key Laboratory of Tribology in Advanced Equipment, Department of Mechanical Engineering, Tsinghua University, Beijing 100084, China*

<sup>\*</sup>Corresponding author: yinxuan@mail.buct.edu.cn (X.Y); hulk@mail.tsinghua.edu.cn (H.P);  
ldm@tsinghua.edu.cn (D.L.)

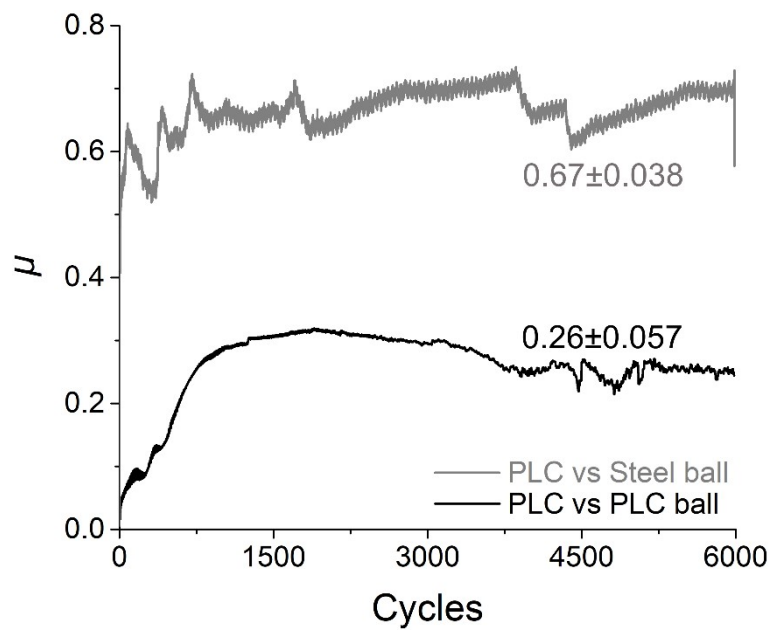

**Figure S1.** Friction curves of PLC film against steel ball or PLC-coated ball under 4 N.

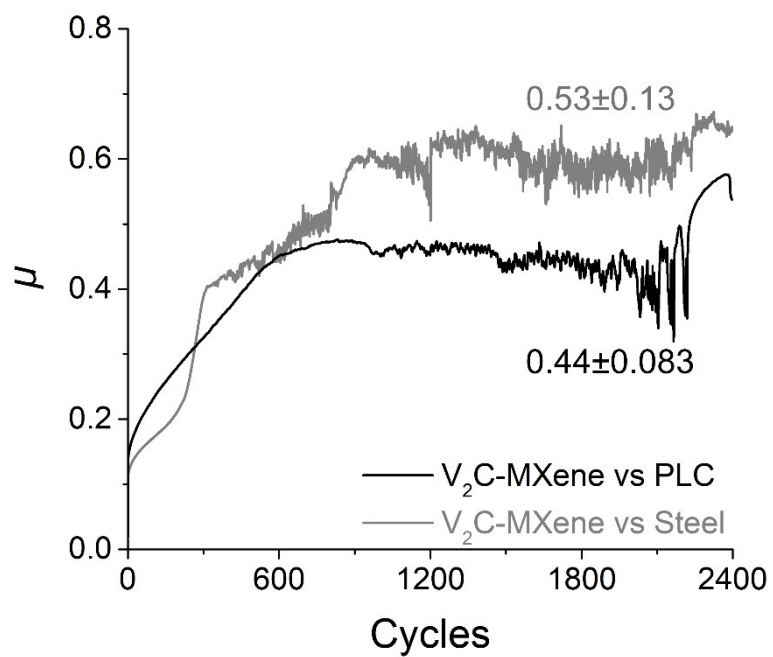

**Figure S2.** Friction curves of the pristine  $V_2C$ -MXene under 4 N.
